# Supplementary material
Source: MDPI journal article supplement (https://www.mdpi.com/2071-1050/16/8/3396)
Supplement: s1 [file s1]

# **Systematic Characterization of Cow Manure Biochar and Its Effect on *Salicornia herbacea* L. Growth**

**Hyokyeong Shin <sup>1</sup>, Danbi Chun <sup>1</sup>, Ick-Rae Cho <sup>2</sup>, Md. Abu Hanif <sup>1,\*</sup>, Sung-Soo Kang <sup>1,3</sup>,  
Lee Ku Kwac <sup>1,3</sup>, Hong Gun Kim <sup>1,3</sup> and Young Soon Kim <sup>1,\*</sup>**

<sup>1</sup> Institute of Carbon Technology, Jeonju University, Jeonju 55069, Republic of Korea

<sup>2</sup> Department of AgroAI, Jeonju University, Jeonju 55069, Republic of Korea

<sup>3</sup> Graduate School of Carbon Convergence Engineering, Jeonju University,  
Jeonju 55069, Republic of Korea

\* Correspondence: hanif21@jj.ac.kr (M.A.H.); kyscjb@jj.ac.kr (Y.S.K.);  
Tel.: +82-63-220-3157 (M.A.H.)

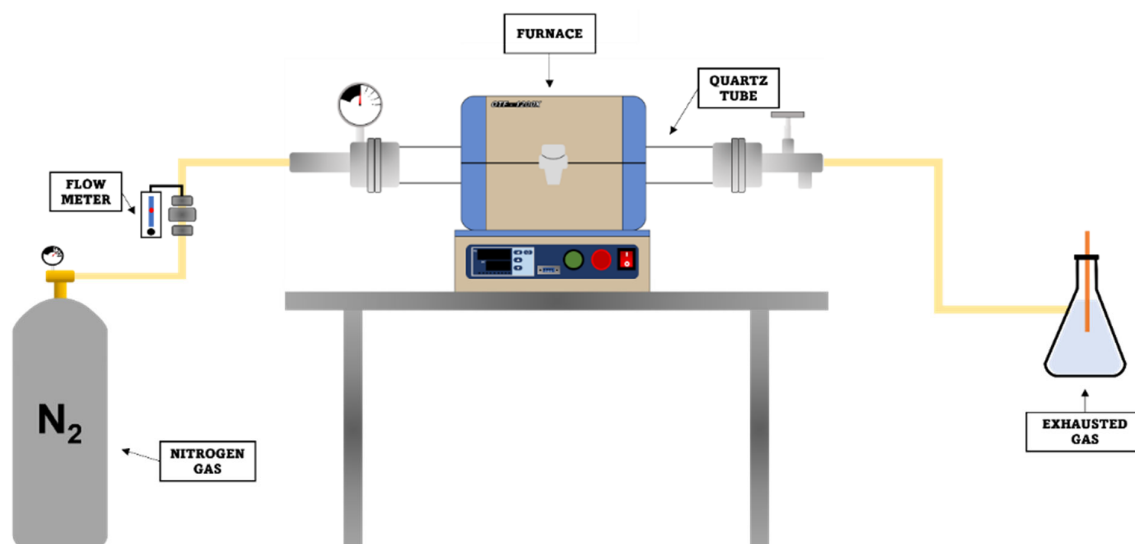

**Figure S1.** Schematic diagram of the pyrolysis reactor.

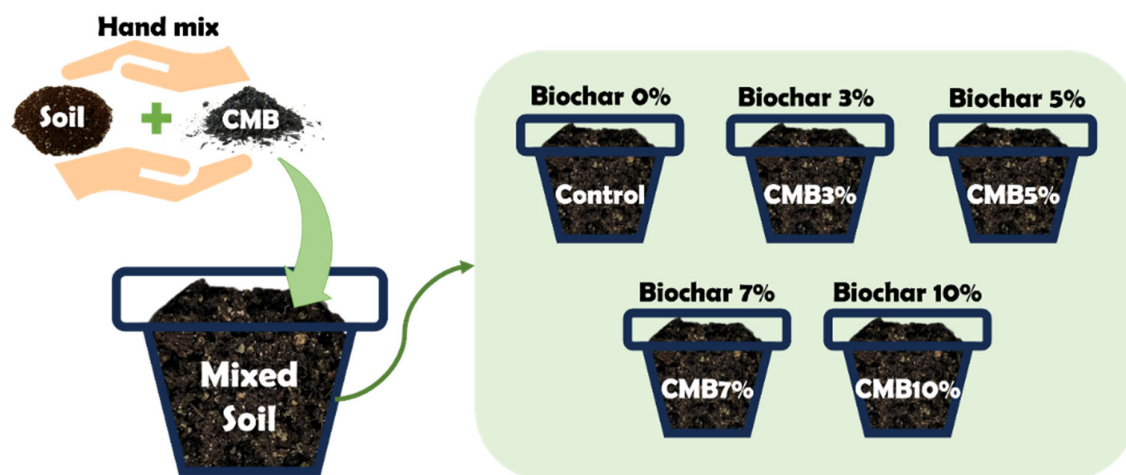

**Figure S2.** Diagram of the pots and soil used in this study.

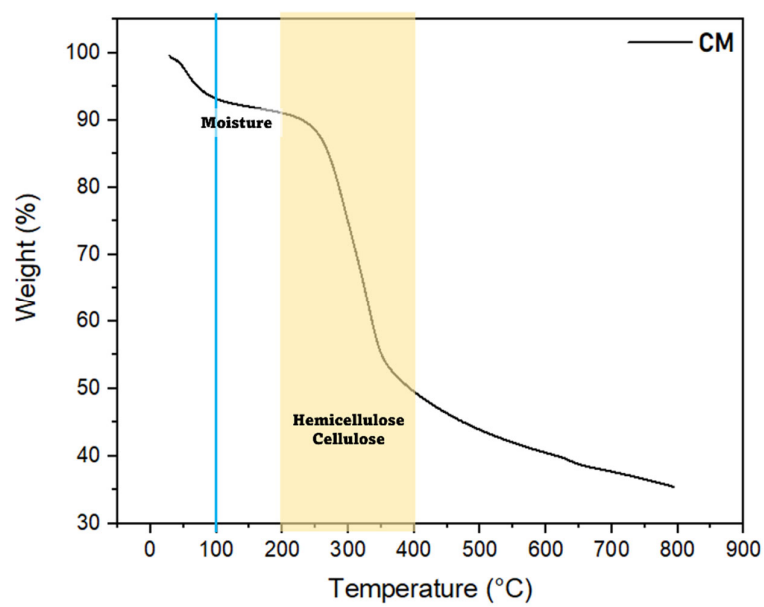

**Figure S3.** TGA curves of CM.

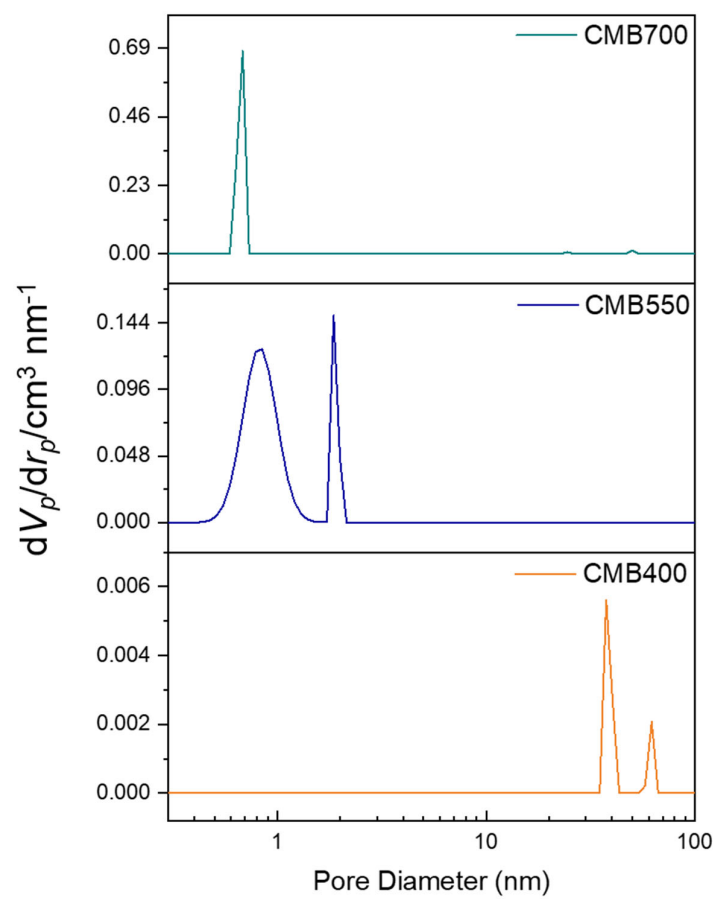

**Figure S4.** Pore size analysis of CMBs.

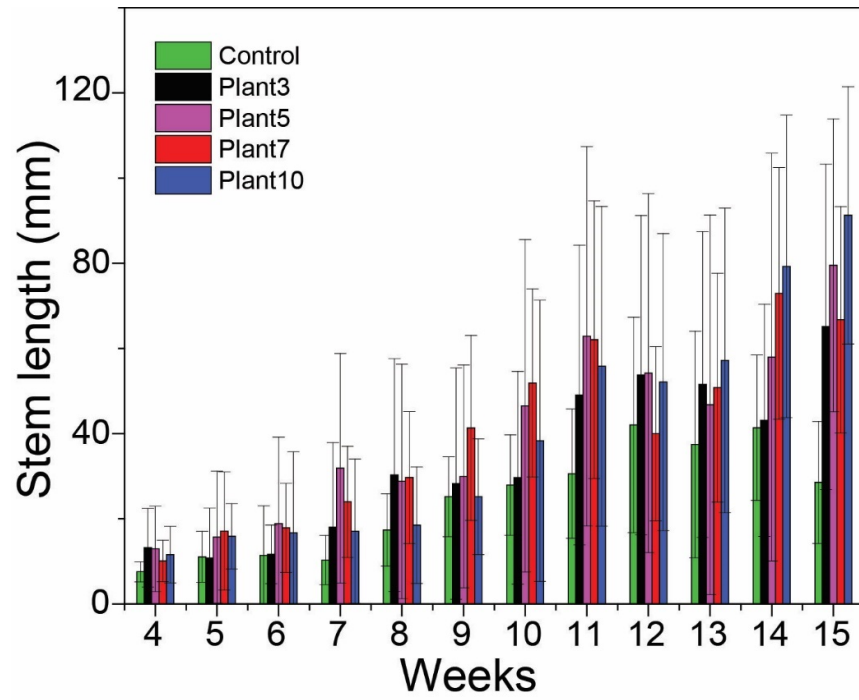

**Figure S5.** The stem-length results of the glasswort plants at 4 to 15 weeks.

**Table S1.** Elemental analysis of samples (CM, CMB400, CMB550, CMB700).

| Samples      | C (%) | H (%) | N (%) | S (%) | O (%) |
|--------------|-------|-------|-------|-------|-------|
| Biomass (CM) | 40.0  | 5.01  | 1.34  | 0     | 30.1  |
| CMB400       | 33.2  | 2.18  | 1.75  | 0     | 13.8  |
| CMB550       | 35.8  | 1.51  | 1.70  | 0     | 9.67  |
| CMB700       | 39.6  | 1.07  | 1.14  | 0     | 4.92  |

**Table S2.** Heavy metal analysis of samples (CM, CMB400, CMB550, CMB700).

| Sample | Zn       | Cu      | Ni     | As    | Cd    | Mo    | Pb    |
|--------|----------|---------|--------|-------|-------|-------|-------|
|        | (ppm)    | (ppm)   | (ppm)  | (ppm) | (ppm) | (ppm) | (ppm) |
| CM     | 100.596  | 20.351  | 12.743 | non   | non   | non   | non   |
| CMB400 | 162.788  | 10.479  | 31.683 | non   | non   | non   | non   |
| CMB550 | 286.237  | 32.687  | 44.545 | non   | non   | non   | non   |
| CMB700 | 1022.702 | 114.013 | 12.639 | non   | non   | non   | non   |



**Table S3.** The functional groups of samples (CM, CMB400, CMB550, CMB700).

| Literature               | Wave number (cm <sup>-1</sup> ) |        |        |        | Characteristic              | Ref.       |
|--------------------------|---------------------------------|--------|--------|--------|-----------------------------|------------|
| adsorption               |                                 |        |        |        | vibrations                  |            |
| band (cm <sup>-1</sup> ) | CM                              | CMB400 | CMB550 | CMB700 | (functionality)             |            |
| ~3600                    | 3604                            | 3626   | 3904   | 3738   | N-H Stretching              | [27]       |
| 3570–3000                | 3378                            | 3238   | 3568   | 3458   | O-H Stretching              | [26,28]    |
|                          | 3172                            | 3008   | 3222   | 3016   |                             |            |
|                          |                                 |        | 3020   |        |                             |            |
| 2950–2800                | 2518                            | 2932   | 2498   | 2970   | C-H <sub>n</sub> Stretching | [26,28,49] |
| ~2400                    |                                 | 2532   |        |        | CO <sub>2</sub> Band        | [50]       |
| 2160–2120                | 2164                            | 2158   | 2150   |        | N=N=N Stretching            |            |
| 2145–2120                |                                 |        |        | 2128   | N=C=N Stretching            |            |
| 2140–1990                | 2026                            | 2024   | 2000   | 1994   | C≡N Cyanide                 |            |
| 2000–1650                |                                 | 1974   |        |        | C-H Bending                 |            |
| 1750–1700                |                                 | 1714   | 1738   |        | C=O Stretching              |            |
| 1632                     |                                 | 1632   |        |        | C=C Stretching              | [26]       |
| 1650–1566                | 1560                            |        |        | 1542   | C=C Stretching              |            |

|           |      |      |      |      |                      |               |
|-----------|------|------|------|------|----------------------|---------------|
| 1440–1400 |      | 1420 | 1444 | 1432 | O–H Bending          | [26]          |
| 1400–1350 | 1396 | 1364 | 1368 | 1368 | C–H bending          | [18]          |
| 1230–1210 |      | 1224 | 1218 | 1214 | C–O–C Stretching     | [18,26]       |
| 1120–1008 | 1054 | 1028 | 1062 | 1012 | C–O Stretching       | [18,26,51,52] |
| 900–700   | 784  |      | 884  | 910  | C–H Bending aromatic | [26,49]       |
|           |      |      | 772  | 776  |                      |               |

---

**Table S4.** Analysis of properties of biochar-treated soil.

| Sample  | TC    | TOC   | CEC                      | OM                    | Zn                     | Soil |
|---------|-------|-------|--------------------------|-----------------------|------------------------|------|
|         | (%)   | (%)   | (cmol Kg <sup>-1</sup> ) | (g Kg <sup>-1</sup> ) | (mg Kg <sup>-1</sup> ) | pH   |
| Control | 15.21 | 15.20 | 67.9                     | 262.22                | 32.30                  | 7.00 |
| CMB3%   | 14.04 | 14.00 | 62.50                    | 242.05                | 45.51                  | 7.41 |
| CMB5%   | 18.67 | 18.51 | 64.75                    | 321.87                | 76.92                  | 7.56 |
| CMB7%   | 18.84 | 18.75 | 69.18                    | 324.80                | 88.71                  | 7.78 |
| CMB10%  | 21.40 | 21.30 | 64.83                    | 368.85                | 111.41                 | 7.65 |

**Table S5.** Heavy metal analysis of *Salicornia herbacea* L.

| Sample  | Cu    | Zn      | As    | Cd    | Mo    | Ni    | Pb    |
|---------|-------|---------|-------|-------|-------|-------|-------|
|         | (ppm) | (ppm)   | (ppm) | (ppm) | (ppm) | (ppm) | (ppm) |
| Control | 4.564 | 117.399 | non   | non   | non   | non   | non   |
| CMB3%   | 3.413 | 63.523  | non   | non   | non   | non   | non   |
| CMB5%   | 2.134 | 62.212  | non   | non   | non   | non   | non   |
| CMB7%   | 2.840 | 63.223  | non   | non   | non   | non   | non   |
| CMB10%  | 3.367 | 61.873  | non   | non   | non   | non   | non   |
